# Supplementary material
Source: PubMed Central journal article supplement (PMC2832967)
Supplement: supp_M109.068247_jbc.M109.068247-1.pdf [file supp_M109.068247_jbc.M109.068247-1.pdf]

**Figure S1.** A) Residues 945-963 do not affect the kinesin-1 tail's affinity for microtubules. Dissociation constants of Tail944 R907C-F or Tail963 R907C-F for microtubules were measured by microtubule co-sedimentation and fluorescence anisotropy, and both constructs were found to have similar affinities for microtubules.  $K_d$  values from both assays are reported in Table 1. B) The kinesin-1 tail binds to microtubules in a salt-dependent manner. Dissociation constants of Tail944 R907C-F for microtubules were measured by fluorescence anisotropy in the presence of 100 mM NaCl ( $K_d = 0.093 \pm 0.012 \mu\text{M}$ ), 150 mM NaCl ( $K_d = 0.144 \pm 0.016 \mu\text{M}$ ), 200 mM NaCl ( $K_d = 0.460 \pm 0.020 \mu\text{M}$ ), 250 mM NaCl ( $K_d = 1.286 \pm 0.083 \mu\text{M}$ ), or 300 mM NaCl ( $K_d > 8 \mu\text{M}$ ). Dissociation constants for all data are reported as the mean  $\pm$  SEM for three experiments.

**Figure S2.** A) The secondary structures of Tail944 and Tail944 A905C Mutant A+B do not vary significantly. Circular dichroism spectra of Tail944 and Tail944 A905C Mutant A+B in the 200-240 nm range show an identical  $\alpha$ -helical content, suggesting that the tail coiled-coil is not significantly disrupted by the alanine substitutions introduced into the Tail944 A905C Mutant A+B construct. Spectra are the mean  $\pm$  SEM of three measurements performed on three separate samples. B) The basic residues in the 892-914 region of the kinesin-1 tail are important for binding to microtubules. Anisotropy and microtubule co-sedimentation data for determining dissociation constants of Tail944 A905C, Tail944 A905C Mutant A, Tail944 A905C Mutant B, and Tail944 A905C Mutant A+B for microtubules are shown (gel fragments show the amount of free (S) or bound (P) tail in the presence of 10  $\mu\text{M}$  microtubules). Fluorescence anisotropy was not applicable to the measurement of  $K_d$  values for the low-affinity interactions (Mutant A, B and A+B) due to sub-saturation binding as discussed in the text. Dissociation constants for all data are reported as the mean  $\pm$  SEM for three experiments.

**Figure S3.** The acidic E-hooks of tubulin are important for binding to kinesin-1 tails. A gel of microtubules and microtubules treated with subtilisin shows the complete digestion of both  $\alpha$ - and  $\beta$ -tubulin (S3A). Dissociation constants of Tail944 R907C-F for microtubules or subtilisin-treated microtubules were measured by microtubule co-sedimentation and subsequent gel analysis of the amount of free (S) and bound (P) tail (S3B), as well as fluorescence anisotropy (S3C). ( $\alpha\beta$  = wild-type microtubules,  $\alpha_s\beta_s$  = subtilisin-treated microtubules).  $K_d$  values from both assays are reported in Table 1. Dissociation constants for all data are reported as the mean  $\pm$  SEM for three experiments.

**Figure S4.** hTau-40 binds to microtubules with a moderate affinity. The dissociation constant of hTau-40 for microtubules was estimated to be  $\sim 5 \mu\text{M}$  in 100 mM NaCl by microtubule co-sedimentation.

**Figure S5.** Kinesin-1 heads and tails bind to distinct sites on microtubules. The amount of Tail944 bound to a fixed concentration of microtubules in the presence of increasing concentrations of kinesin K349 CLM G234A heads did not change as shown by microtubule co-sedimentation in S5A. The amount of K349 CLM G234A bound to a fixed concentration of microtubules in the presence of increasing concentrations of Tail944 did not change as shown by a microtubule co-sedimentation assay in S5B.

# Figure S1

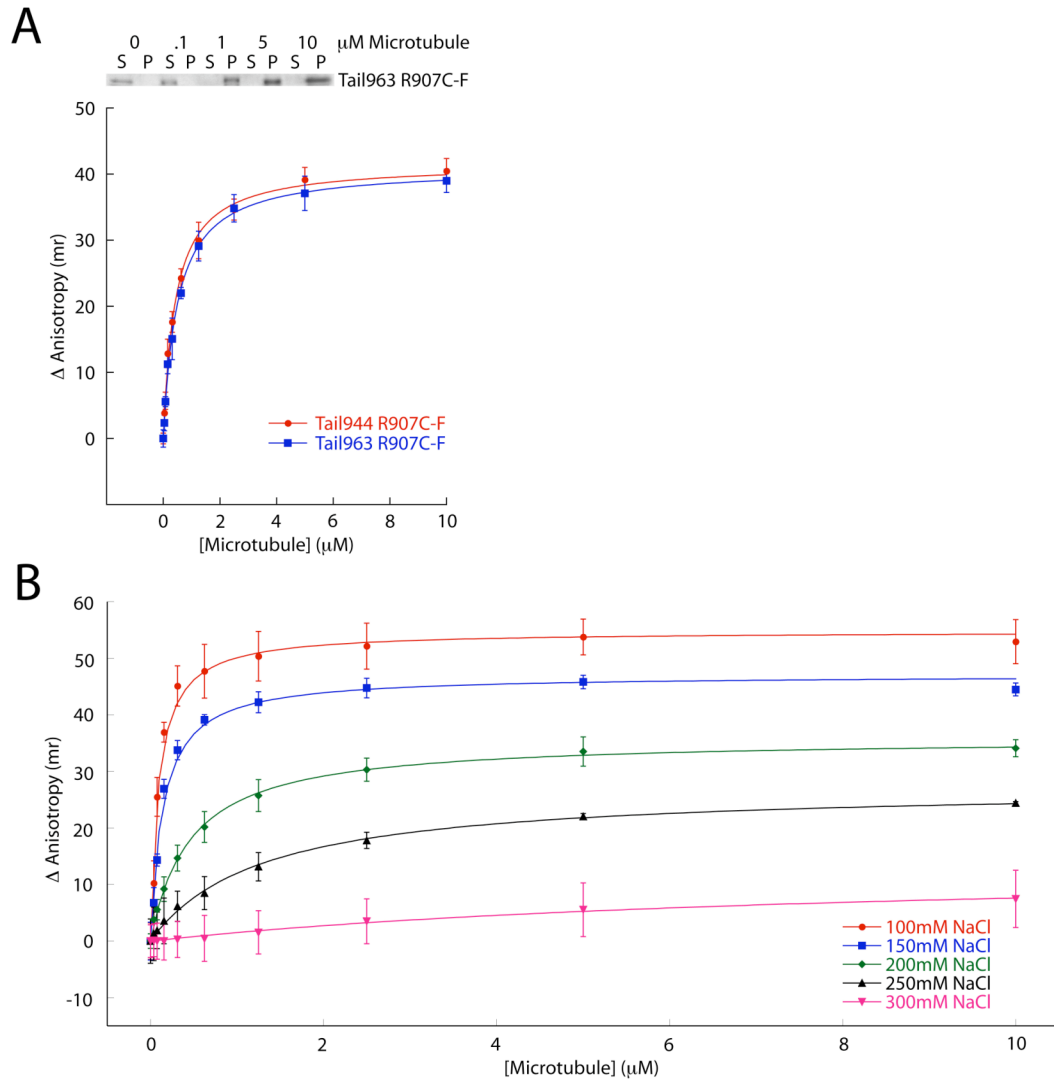

# Figure S2

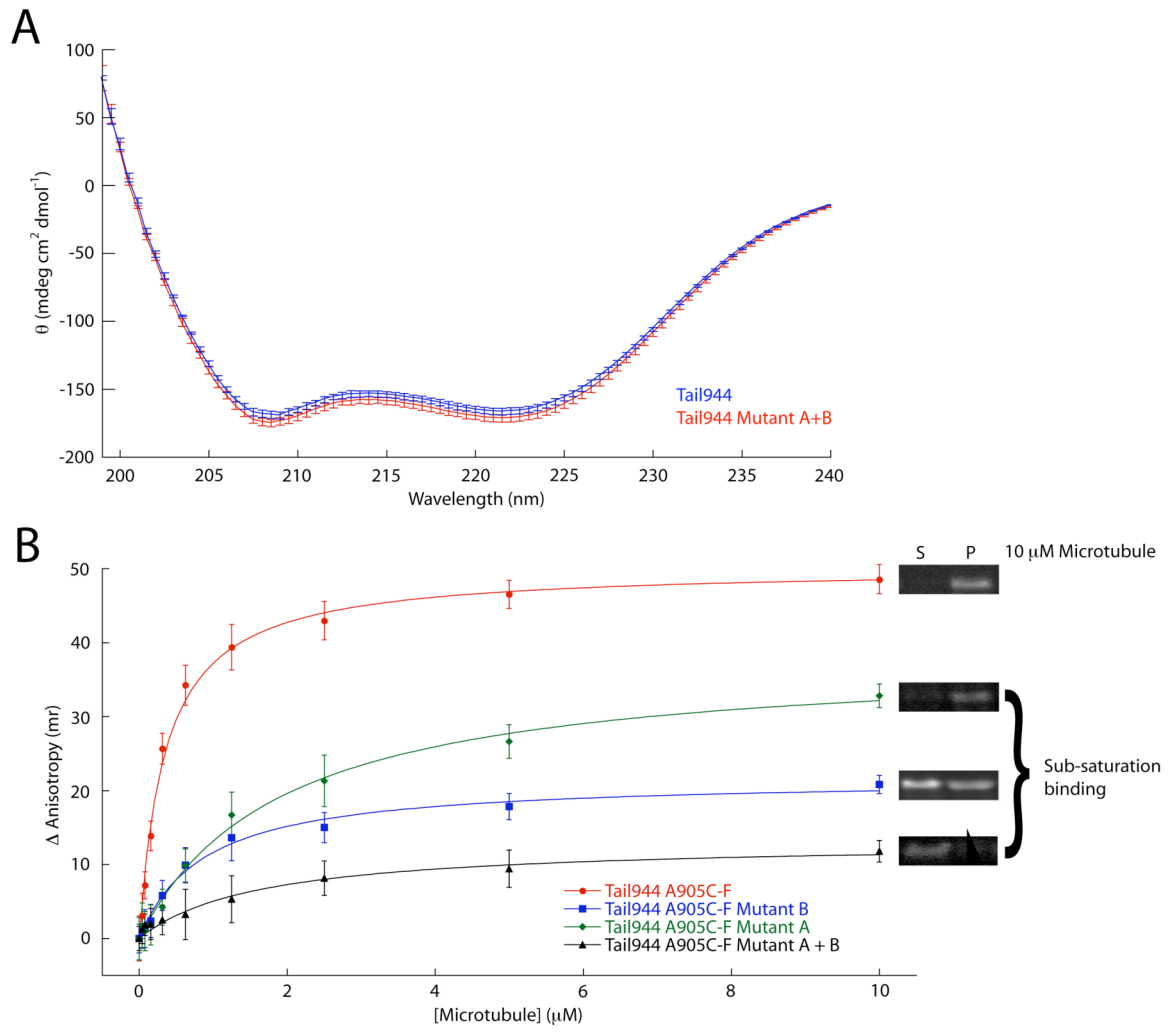

# Figure S3

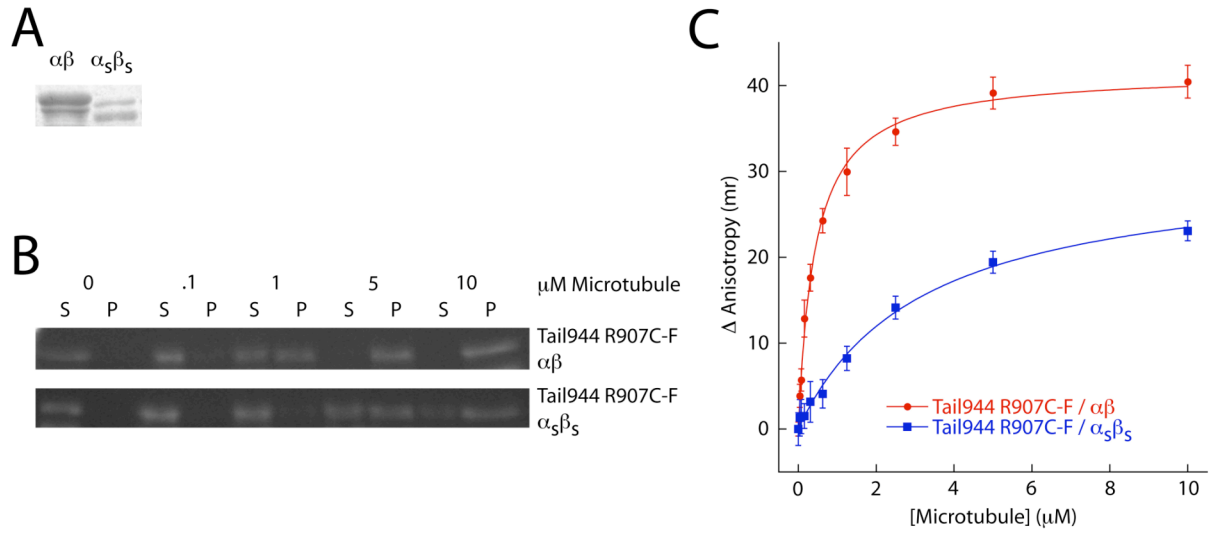

# **Figure S4**

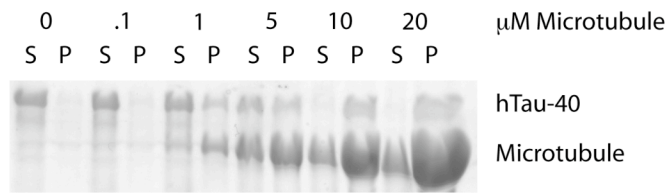

## Figure S5

# A

|   |     |     |     |     |     |     |     |                              |
|---|-----|-----|-----|-----|-----|-----|-----|------------------------------|
| 0 | 2.5 | 2.5 | 2.5 | 2.5 | 2.5 | 2.5 | 2.5 | $\mu\text{M}$ Microtubule    |
| 0 | 0   | .1  | 1   | 5   | 10  | 50  |     | $\mu\text{M}$ K349 CLM G234A |
| 1 | 1   | 1   | 1   | 1   | 1   | 1   |     | $\mu\text{M}$ Tail944        |
| S | P   | S   | P   | S   | P   | S   | P   |                              |

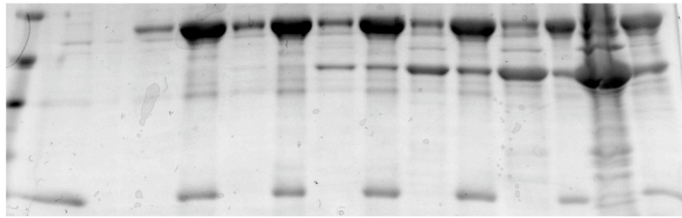

Microtubule  
K349 CLM G234A

Tail944

# B

|   |     |     |     |     |     |     |     |                              |
|---|-----|-----|-----|-----|-----|-----|-----|------------------------------|
| 0 | 2.5 | 2.5 | 2.5 | 2.5 | 2.5 | 2.5 | 2.5 | $\mu\text{M}$ Microtubule    |
| 1 | 1   | 1   | 1   | 1   | 1   | 1   | 1   | $\mu\text{M}$ K349 CLM G234A |
| 0 | 0   | .1  | 1   | 5   | 10  | 50  |     | $\mu\text{M}$ Tail944        |
| S | P   | S   | P   | S   | P   | S   | P   |                              |

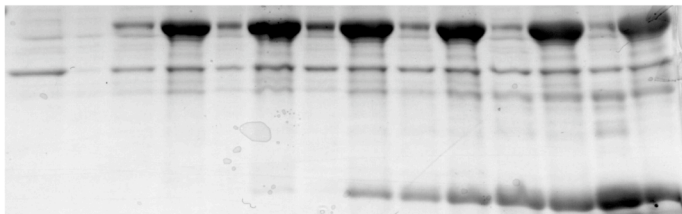

Microtubule  
K349 CLM G234A

Tail944
